# A Mechanistic Modeling Framework Reveals the Key Principles Underlying Tumor Metabolism

Shubham Tripathi<sup>1, 2</sup>, Jun Hyoung Park<sup>3</sup>, Shivanand Pudakalakatti<sup>4</sup>, Pratip K. Bhattacharya<sup>4</sup>, Benny Abraham Kaiparettu<sup>3, 5</sup>, and Herbert Levine<sup>2</sup>

<sup>1</sup> PhD Program in Systems, Synthetic, and Physical Biology, Rice University, Houston, Texas, USA

<sup>2</sup> Center for Theoretical Biological Physics and Department of Physics, Northeastern University, Boston, Massachusetts, USA

<sup>3</sup> Department of Molecular and Human Genetics, Baylor College of Medicine, Houston, Texas, USA

<sup>4</sup> Department of Cancer Systems Imaging, The University of Texas MD Anderson Cancer Center, Houston, Texas, USA

<sup>5</sup> Dan L. Duncan Cancer Center, Baylor College of Medicine, Houston, Texas, USA

**Financial support:** This work was supported by the National Science Foundation grant no. PHY-2019745, and by the National Institutes of Health grants nos. CA253445 and CA234479.

**Corresponding author:** Herbert Levine, Northeastern University, 360 Huntington Avenue, 177-1300, Boston, MA 02115, USA. Phone: 617-373-3004. Email: [h.levine@northeastern.edu](mailto:h.levine@northeastern.edu).

**Conflict of interest statement:** The authors declare no potential conflicts of interest.

**Running title:** Mathematical Model of Tumor Metabolism

## Abstract

While aerobic glycolysis, or the Warburg effect, has for a long time been considered a hallmark of tumor metabolism, recent studies have revealed a far more complex picture. Tumor cells exhibit widespread metabolic heterogeneity, utilizing glycolysis, oxidative phosphorylation, or both, and can switch between different metabolic phenotypes. A framework to analyze the observed metabolic heterogeneity and plasticity is, however, lacking. Using a mechanistic model that includes the key metabolic pathways active in tumor cells, we show that the inhibition of phosphofructokinase by excess ATP in the cytoplasm can drive a preference for aerobic glycolysis in fast-proliferating tumor cells. The differing rates of ATP utilization by tumor cells can therefore drive metabolic heterogeneity. Building upon this idea, we couple the metabolic phenotype of tumor cells to their migratory phenotype, and show that our model predictions are in agreement with previous experiments. We report that the reliance of proliferating cells on different anaplerotic pathways depends on the relative availability of glucose and glutamine, and can further drive metabolic heterogeneity. Finally, using treatment of melanoma cells with a BRAF inhibitor as an example, we show that our model can be used to predict the metabolic and gene expression changes in cancer cells in response to drug treatment. By making predictions that are far more generalizable and interpretable as compared to previous tumor metabolism modeling approaches, our framework identifies key principles that govern tumor cell metabolism, and the reported heterogeneity and plasticity. These principles could be key to targeting the metabolic vulnerabilities of cancer.

**Significance:** This study presents an interpretable mathematical framework for analyzing the metabolic heterogeneity and plasticity exhibited by tumor cells.

## Introduction

Proposed as an emerging hallmark of cancer nearly a decade ago (1), metabolic reprogramming has now entered into the limelight of cancer biology as a key feature of tumor cells across cancer subtypes, with multiple therapeutic implications (2). Aerobic glycolysis, commonly known as the Warburg effect (3), characterized by increased glucose uptake most of which is excreted out as lactate even under normoxic conditions, has been synonymous with cancer cell metabolism for nearly a century. Studies carried out over the past decade have however revealed a more complex picture— there exists widespread intra-tumoral heterogeneity in the activity

of different metabolic pathways. Further, tumor cells at different stages of metastatic progression exhibit different metabolic phenotypes and metastases to distinct organs can also exhibit differences in their metabolic activity (4,5). Understanding the mechanistic basis of metabolic heterogeneity in different contexts will be key to the design of anti-cancer metabolic therapies.

Surprisingly, the mechanistic underpinnings that drive the preference for the Warburg effect phenotype in cancer cells are not yet fully understood (6). Multiple hypotheses have been put forth to explain this behavior. It was initially proposed that cancer cells have defective mitochondria and, therefore, cannot utilize pyruvate via the tricarboxylic acid (TCA) cycle followed by oxidative phosphorylation pathway (7). However, it has since been shown that most cancer cells possess functional mitochondria and can carry out oxidative glucose metabolism (8–10). Others have proposed that cancer cells exhibiting aerobic glycolysis may have an advantage from an evolutionary game theory perspective— under limited resource availability, cells that produce ATP faster but less efficiently (via glycolysis for example) can outcompete other cells in the population that produce ATP efficiently, yet at a slower rate (via the TCA cycle for example) (11,12). Vazquez *et al.* have proposed that a switch to aerobic glycolysis can result from the maximization of rate of ATP production by cancer cells under high glucose uptake (13). Shlomi *et al.* used a genome-scale metabolic model to show that under a solvent capacity constraint, the Warburg effect maximizes the rate of biomass production in cancer cells (14). The analyses in these studies do not predict the widespread heterogeneity in the metabolic profiles of cancer cells in the primary tumor and of tumor cells at different stages of metastatic disease progression. Further, the frameworks in these studies do not connect the metabolic heterogeneity in tumor cells to the heterogeneity in other phenotypic states such as cell migration and to the variability in the availability of different nutrients.

Recently, Jia *et al.* have put forth a systems-level analysis of coupled gene regulatory networks and metabolic pathways to describe metabolic heterogeneity and plasticity in tumor cells (15). The study shows that cancer cells can switch between different metabolic states in response to changes in the activities of master regulators such as AMPK and HIF-1. However, the modeling approach therein is too coarse-grained to answer some interesting questions relating to the flux through different reactions in the metabolic pathways and to predict the detailed cellular response to perturbations in the activities of specific enzymes.

Here, we construct a mechanistic model which incorporates the key metabolic reactions that have been shown to be active in cancer cells. Instead of relying on a stoichiometric modeling framework, commonly known as flux balance analysis (16), we write down detailed mathematical equations describing the kinetics of different enzymatic reactions. The resultant system of ordinary differential equations can be numerically integrated to determine the steady state of the metabolic system. We show that the preference for aerobic glycolysis increases the flux through the anabolic pathways that use glycolytic intermediates as substrates, thereby facilitating fast proliferation. This results from the low ATP production when glucose is excreted out as lactate as compared to when glucose enters the TCA cycle as pyruvate. The rate of ATP consumption in cancer cells, which can vary with other cellular phenotypic properties, can modulate the preference of cancer cells for aerobic glycolysis versus oxidative phosphorylation. Next, we explore how the relative dependence of cancer cells on glucose and glutamine and the relative availability of these nutrients in the microenvironment can affect the metabolic profiles of tumor cells. Further, we use the model to predict the changes in the metabolic and gene expression profiles of melanoma cells under treatment with a BRAF inhibitor that can suppress glutamine uptake. Finally, we discuss how different experimental observations relating to cancer cell metabolism fit within the context of our modeling framework.

## Materials and Methods

### **A mechanistic mathematical model of tumor metabolism**

We used ordinary differential equations to model the key metabolic pathways active in tumor cells— glycolysis, the TCA cycle, oxidative phosphorylation, and glutaminolysis. The differential equations were integrated numerically to obtain the steady state model behavior. The mathematical expressions describing the activity of the different enzymes and the relevant kinetic parameters were taken from the literature (17–21). Oxidative phosphorylation and the electron transport chain reactions were treated using a simplified model proposed

previously by Nazaret *et al.* (22). In cases where the relevant mathematical expressions for enzymatic activity and the kinetic parameters were unavailable, reasonable assumptions based on Michaelis-Menten kinetics (23) were made. Activation and inhibition of different enzymes were modeled by changing the reaction velocity ( $V_{max}$ ) for the enzyme by a multiplicative factor. In contrast to previous mechanistic tumor metabolism modeling studies that fine tune model parameters so that the model behavior is in agreement with the observations from a certain experimental setup (see Roy and Finley (24) for example), we focus on exploring the possible set of behaviors that tumor cells can exhibit under different conditions. This allowed us to develop a framework that can be utilized to analyze the metabolic behavior of tumor cells across cancer types and in different environments.

The mathematical expressions describing model behavior and the relevant kinetic parameters are included in the supplementary data. The supplementary data also includes the assumptions underlying our modeling approach. Matlab code used to simulate the model behavior is available online (<https://github.com/st35/cancer-metabolism>).

### **Cell culture and knockdown of pyruvate carboxylase**

MDA-MB-468 breast cancer cells were maintained in DMEM cell culture medium supplemented with 5% FBS, 100 units / ml penicillin, and 100  $\mu$ g / ml streptomycin. The cell line was authenticated using short tandem repeat profiling by the MD Anderson Cancer Center Cytogenetics and Cell Authentication Core. pGIPZ lentivirus shRNA for pyruvate carboxylase (PC) was purchased from the Cell-Based Assay Screening Service (C-BASS) Core at Baylor College of Medicine. The lentivirus with scrambled (control) or PC-targeting shRNA was infected using the standard protocol (25). Knockdown efficiency was validated by western blot analysis using specific antibodies.

### **Cell Respiratory Assay**

Oxygen consumption rate (OCR) was measured using the XFp extracellular flux analyzer (Seahorse Biosciences) as previously described (25) with a minor modification. Cell Mito Stress kit (Seahorse Biosciences) was used for the assay and basal OCR was calculated by Report Generator Version 4.03 (Seahorse Biosciences).

### **High-resolution Nuclear Magnetic Resonance (NMR) Spectroscopy**

Metabolites were extracted from cell pellets using 3 mL 2:1 methanol-water solvent and 0.5 ml of lysing beads (Lysing Matrix D from MP Biomedicals, LLC). The mixture was vortexed and freeze-thawed to extract the metabolites. This was followed by centrifugation at 4,000 RPM for 10 minutes to remove debris, and rotary evaporation and overnight lyophilization to remove the solvent. The samples were prepared for NMR spectroscopy by dissolving the lyophilized sample in 800  $\mu$ L of  $^2\text{H}_2\text{O}$  following the centrifugation at 10,000 RPM for 5 minutes to remove any debris that remained. Finally, 600  $\mu$ L of the sample, with the addition of 40  $\mu$ L of 8 mM NMR reference compound 2, 2-dimethyl-2-silapentane-5-sulfonate (DSS), was used for NMR spectroscopy. Final concentration of DSS in the sample was 0.5 mM. The standard one dimensional  $^1\text{H}$  with water suppression during relaxation time was used to acquire the data. All 1D spectra were acquired with 32K time domain points, 2 seconds acquisition time, 256 transients, 64 receiver gain, 16 ppm spectral width, and 6 second relaxation delay on a Bruker NMR spectrometer operating at 500 MHz proton resonance frequency equipped with cryogenically cooled triple resonance ( $^1\text{H}$ ,  $^{13}\text{C}$ ,  $^{15}\text{N}$ ) TXI probe (26). The data was processed using Topspin 3.1 and resonances were identified using Chenomx NMR suite 7.0 from Chenomx Inc and the human metabolic database (HMDB) (27).

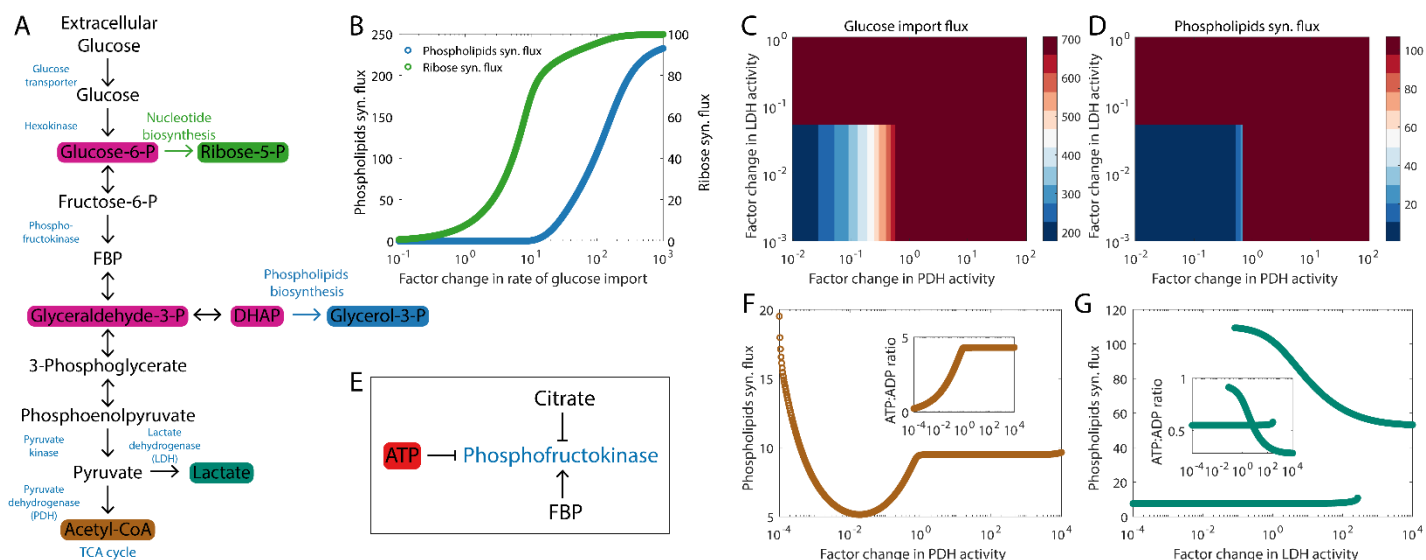

**Figure 1** High ATP production during oxidative phosphorylation can drive a preference for aerobic glycolysis in fast proliferating cells. (A) Reactions in the glycolytic pathway and key anabolic processes that use glycolytic intermediates as substrates. The pyruvate generated at the end of glycolysis can either be excreted out as lactate or enter the TCA cycle as acetyl-CoA. (B) Increased glucose uptake can drive large fluxes through the ribose synthesis pathway and through the phospholipids synthesis pathway. (C) Increasing the activity of pyruvate dehydrogenase (PDH), lactate dehydrogenase (LDH), or both can increase the glucose uptake. (D) The phospholipids synthesis flux increases upon the upregulation of PDH, LDH, or both. In (C) and (D), we have assumed that the ATP concentration in the cytoplasm remains constant despite the higher ATP production per glucose molecule when glucose is allowed to enter the TCA cycle by upregulating PDH activity. (E) Different metabolites that can modulate the enzymatic activity of phosphofruktokinase (PFK). FBP: fructose-1, 6-biphosphate. (F) Variation of the phospholipids synthesis flux with an increase in PDH activity (while keeping LDH activity fixed). (G) Variation of the phospholipids synthesis flux with an increase in LDH activity (while keeping PDH activity fixed). The insets in (F) and (G) show how the ATP:ADP ratio varies in each case. The bistability in the phospholipids synthesis flux as the LDH activity is varied arises from a positive feedback loop— fructose-1, 6-biphosphate, the product of PFK’s enzymatic activity, can allosterically activate the enzyme (see panel E). Fluxes are in units of mM h<sup>-1</sup> (millimolar per hour) and are shown at steady state.

## Results

### Inhibition of phosphofruktokinase by ATP can drive the preference for aerobic glycolysis in fast proliferating cells.

As shown in Fig. 1 A, intermediate metabolites generated during the multi-step process that converts glucose to pyruvate are used in key anabolic processes required for cell division (28). These include the ribose synthesis pathway, crucial for nucleotide synthesis, and the phospholipids synthesis pathway. A large flux through both these pathways is likely to facilitate fast proliferation. To determine how this may be achieved, we simulated the dynamics of the glycolysis pathway along with the first reactions in the ribose synthesis and the phospholipids synthesis pathways. Fig. 1 B shows that the steady state flux through both ribose synthesis and phospholipids synthesis pathways can be increased by increasing the rate of glucose uptake. To obtain this result, we have assumed that all the pyruvate that is generated from the glucose taken up by a cell is utilized via some metabolic process inside the cell and that any ATP produced during such a process is also used up, thereby keeping constant the concentration of ATP inside the cell. The pyruvate generated from glucose can have two primary fates (Fig. 1 A). On the one hand, lactate dehydrogenase (LDH) can convert pyruvate into lactate which is then



excreted out of the cell. On the other hand, the pyruvate can enter the mitochondria where it is converted to acetyl coenzyme A (acetyl-CoA) by the enzyme pyruvate dehydrogenase (PDH) and further oxidized via the TCA cycle. The rate of glucose uptake in tumor cells can be increased by increasing the activity of either of the two enzymes (Fig. 1 C). The increased glucose uptake in turn increases the flux through the phospholipids synthesis pathway (Fig. 1 D). The symmetry between increasing glucose uptake and the phospholipids synthesis flux via increased lactate excretion and via increased flux through the TCA cycle, apparent in Fig. 1 C and 1 D, is broken when the rates of ATP production in the two processes are taken into consideration (Fig. 1 E-G). If the carbon taken in as glucose is excreted out as lactate, 2 ATP molecules per molecule of glucose are produced. Using the glucose carbon to drive the TCA cycle followed by oxidative phosphorylation can generate 30-32 molecules of ATP per glucose molecule (29). At a fixed rate of ATP consumption by the cell, using a large fraction of the glucose taken up by the cell to drive the TCA cycle can lead to increased ATP accumulation in the cytoplasm (see inset in Fig. 1 F) which will inhibit the glycolytic enzyme phosphofructokinase (PFK), shutting down glucose uptake (30) and driving down the phospholipids synthesis flux (Fig. 1 F). Excreting out the glucose carbon as lactate, on the other hand, can limit the ATP-mediated downregulation of PFK activity (see inset in Fig. 1 G), thereby maintaining a high phospholipids synthesis flux (Fig. 1 G) which would help maintain fast proliferation rates. This offers a possible explanation for the preference for glucose carbon secretion as lactate even under normoxic conditions (the Warburg effect) seen in fast proliferating tumor cells across cancer types.

### **Varying ATP requirements can drive heterogeneity in the metabolic phenotypes exhibited by tumor cells.**

In the previous section, we have shown that the inhibition of PFK due to the accumulation of excess ATP (generated by allowing glucose-derived pyruvate to enter the TCA cycle) can downregulate anabolic processes including phospholipids synthesis. We propose that this could be the reason many fast proliferating cells exhibit the Warburg effect. The hypothesis implies that modulation of the rate of ATP consumption in cells can change which metabolic phenotype will lead to a large flux through anabolic processes and thus facilitate fast proliferation. Fig. 2 A shows that the metabolic phenotype that maximizes the flux through the phospholipids synthesis pathway can change as the rate of ATP consumption by tumor cells changes. At low, basal rates of ATP consumption, the high lactate secretion, low TCA cycle flux (high LDH, low PDH) metabolic phenotype is needed for driving a large flux through the phospholipids synthesis pathway. A switch to a phenotype with high TCA cycle flux (high PDH) will shut down this key anabolic process. However, in cells that consume ATP at very high rates, for example, in metastasizing cancer cells that are actively migrating through the extracellular matrix (31), ATP will not accumulate to concentrations high enough to inhibit PFK activity even when large amounts of ATP are produced per glucose molecule via the TCA cycle. These cells can thus sustain fast proliferation rates while not exhibiting the Warburg effect. Difference in ATP consumption by cells at different stages of metastasis can thus contribute towards the differences in the metabolic profiles of tumor cells at distinct stages of metastasis. Note that in Fig. 2 A, we have assumed that there is sufficient oxygen available for ATP generation via TCA cycle followed by oxidative phosphorylation and the electron transport chain. When the oxygen supply is limited (as is often the case in the interior of solid tumors), cells have to rely solely on converting glucose to lactate for ATP production (anaerobic glycolysis). In such a scenario, the rate of lactate production will be higher in cells with higher rates of ATP consumption (Fig. 2 B).

A connection between ATP consumption by tumor cells and their metabolic phenotype was recently demonstrated by te Boekhorst *et al.* (32). They observed that the stabilization of HIF1 (which downregulates PDH activity) in 4T1 mouse breast cancer cells decreased the oxygen consumption rate (OCR), as expected, but surprisingly did not significantly increase the rate of lactate production (Fig. 2 C). The decrease in OCR is indicative of a decrease in the flux through the TCA cycle. Our model predicts that this can happen if ATP consumption by tumor cells also decreases along with the downregulation of PDH activity upon HIF1 stabilization (Fig. 2 D). This is indeed true in the case of 4T1 cells— upon DMOG treatment (which stabilizes HIF1), 4T1 cells underwent a change in their mode of migration from an actin-driven mode to an amoeboid mode involving blebbing protrusions (32). ATP consumption in the actin-driven mode of cell migration is much higher as compared to that in the cell migration mode dominated by blebbing protrusions (31). The decrease in

ATP consumption upon the switch in the migration mode could have suppressed the expected increase in lactate production in this experiment (Fig. 2 D). Whether the switch in the mode of migration is driven by changes in gene expression caused directly by HIF1 stabilization or by the metabolic changes in response to HIF1 stabilization remains a very interesting but yet unanswered question.

Another scenario wherein different ATP requirements can underlie the observed metabolic heterogeneity is collective invasion by tumor cells. Leader cells, which are at the invading edge of the tumor cell pack and use ATP for membrane protrusion, for maintaining focal adhesion stability, and for remodeling of the extracellular matrix, have a higher ATP requirement as compared to the trailing follower cells. To maximize ATP production, leader cells must rely on the TCA cycle and oxidative phosphorylation which help drive a large flux through any pathway that consumes ATP (see inset in Fig. 2 A). Our model predicts that given the reliance of leader cells on the TCA cycle, they will likely proliferate at a rate lower than that of follower cells (which exhibit high lactate production) for a range of ATP consumption rates (between  $10^{-2}$  and  $10^{-1}$  on the horizontal axis in Fig. 2 A, for example). Such behavior was recently observed by Commander *et al.* (33) for the H1299 non-small cell lung cancer cell line— follower cells isolated from the cultures of this cell line exhibited higher lactate production and higher proliferation rates as compared to the leader cells from the same culture. Our model further predicts that under very high rates of ATP consumption when complete glucose oxidation via the TCA cycle (driven by high PDH) is the preferred metabolic state, the phospholipids synthesis flux will increase upon the upregulation of GLUT1 (a glucose transporter) activity (Fig. 2 D). The observation that GLUT1 overexpression in leader cells can increase their proliferation rate (33) provides some preliminary evidence in support of this prediction.

The results reported in this section illustrate how our modeling framework can be used to explain the co-variation of such seemingly disparate phenotypes as cell proliferation and cell migration. Note that here we have focused on the phospholipids synthesis pathway as a representative example from the set of anabolic pathways that use glycolytic intermediates as substrates. The qualitative model predictions will remain unchanged for any other anabolic pathway of interest which relies upon a glycolytic intermediate generated downstream from the enzyme PFK (the serine synthesis pathway for example (34)).

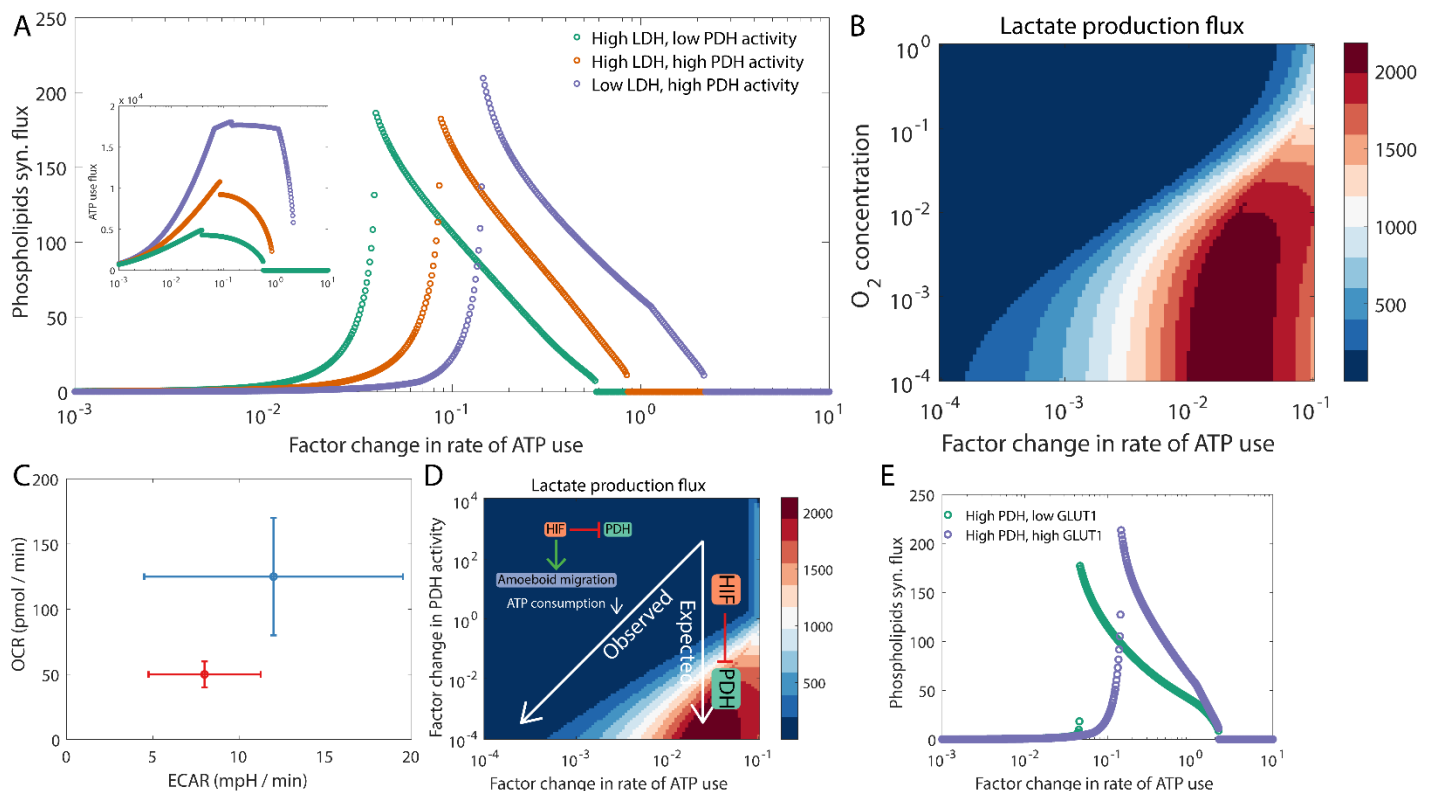

**Figure 2** Rate of ATP consumption by tumor cells can modulate the preference for aerobic glycolysis versus oxidative phosphorylation. (A) The regime that maximizes the phospholipids synthesis flux depends on the rate of ATP consumption. The inset shows that the flux through pathways that consume ATP is maximized when the activity of PDH is high, i.e., when most of the glucose carbon enters the TCA cycle. (B) The rate of lactate production by tumor cells can depend not only on the availability of oxygen in the microenvironment but also the rate of ATP consumption. (C) Change in the metabolic profile of 4T1 cells upon HIF1 stabilization (red) as compared to the control (blue). The behavior shown is representative of that reported by te Boekhorst *et al.* (32) (see Fig. 5e therein). ECAR: extracellular acidification rate, which correlates positively with the rate of lactate excretion by cells. (D) Change in the metabolic profile of cells upon HIF1 stabilization (which inhibits PDH activity) as predicted by our model. The change labeled as expected is when the migratory phenotype (and the rate of ATP consumption) remains unchanged upon HIF1 stabilization. The change labeled as observed is when HIF1 stabilization is accompanied by a switch from actin-driven migration to amoeboid migration (32) which decreases the rate of ATP consumption during cell migration. (E) Under high PDH activity and very high ATP consumption rate, GLUT1 up-regulation can increase the phospholipids synthesis flux. Fluxes are in units of mM h<sup>-1</sup> (millimolar per hour) and are shown at steady state.

### **Distinct anaplerotic pathways can contribute towards *de novo* fatty acid synthesis.**

Fatty acids are a key biomolecular requirement for membrane synthesis, a necessity for cell division. While some tumor cells can take up fatty acids from the extracellular environment, others must synthesize the required fatty acids *de novo* (35). A key substrate for fatty acid synthesis is acetyl-CoA, an intermediate of the TCA cycle, which is removed from the TCA cycle as citrate (Fig. 3 A). In the cytoplasm, the enzyme ACLY converts citrate back to acetyl-CoA. The enzyme ACC then converts acetyl-CoA to malonyl-CoA, a precursor for the synthesis of fatty acids (35). To keep the sequence of reactions in the TCA cycle going, the intermediates must be replenished to compensate for the loss of citrate. The metabolic reactions that replenish the metabolites harvested from the TCA cycle for other cellular processes are called anaplerotic reactions (36). Glutamine is a key biomolecule that can contribute towards anaplerosis during *de novo* fatty acid synthesis— glutamine can be converted to  $\alpha$ -ketoglutarate which replenishes the carbon removed from the TCA cycle as citrate (Fig. 3 A). As shown in Fig. 3 B, when the fatty acid synthesis pathway is active (high ACC activity), our model predicts that the TCA cycle will shut down in the absence of glutamine unless there are other active pathways that can replenish the TCA cycle carbon lost as citrate. Sufficient glutamine availability is needed to drive a large flux through the fatty acid synthesis pathway (Fig. 3 C). Oxygen is essential for the oxidation of NADH via oxidative phosphorylation and the electron transport chain to keep the TCA cycle running. Therefore, the anaplerotic pathway described above can only function when oxygen is available (green curve in Fig. 3 E) since it involves all the reactions of the TCA cycle. Under hypoxic conditions, an alternate reaction pathway, mediated by NADPH-dependent IDH, may be activated to utilize glutamine for anaplerosis— reductive carboxylation of  $\alpha$ -ketoglutarate to directly form citrate (Fig. 3 D and orange curve in Fig. 3 E). Thus, depending on the oxygen availability in different parts of the tumor microenvironment, proliferating cells can exhibit activity of different glutamine-driven anaplerotic pathways. Metabolic profiles of cells proliferating under normoxic and hypoxic conditions in a glutamine-dependent manner will therefore be different (Fig. 3 F).

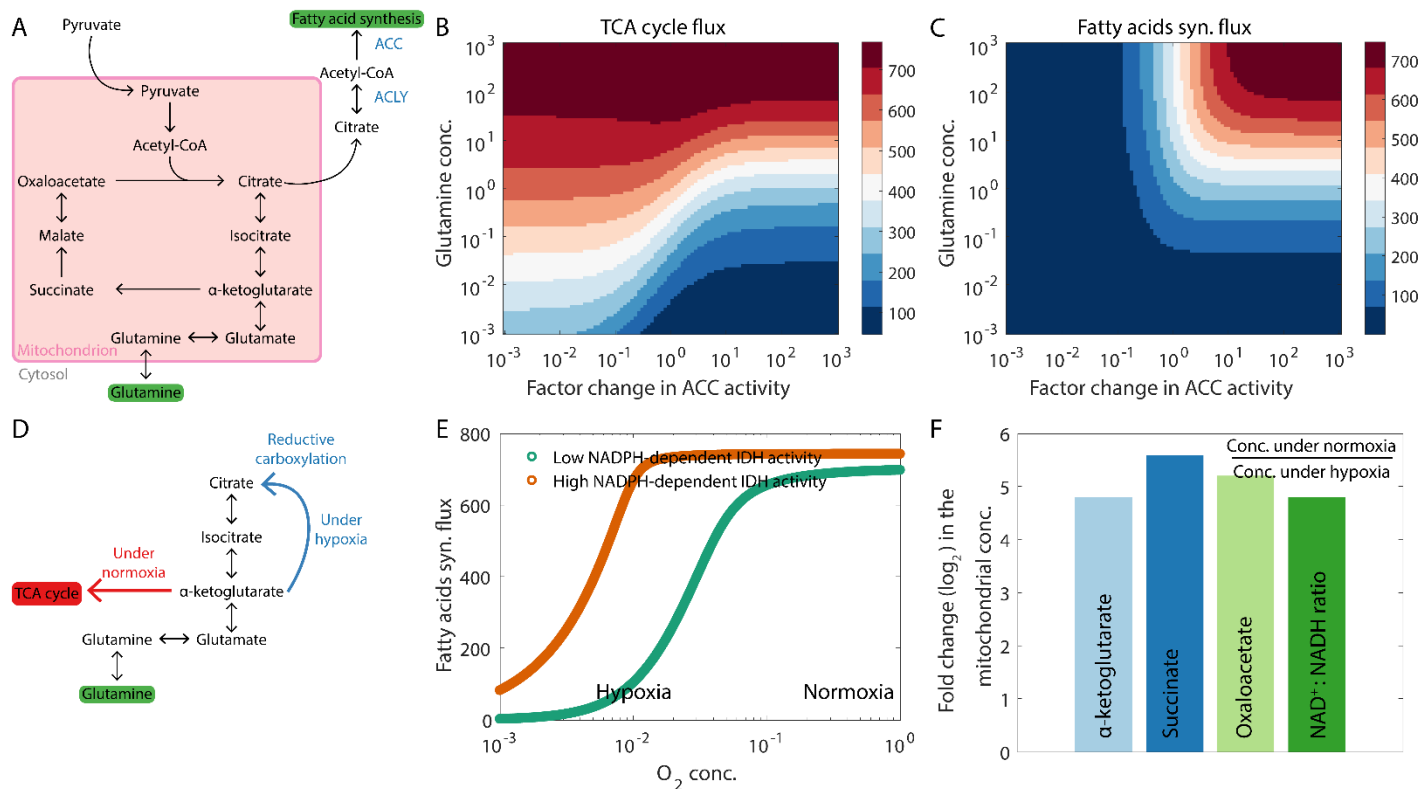

**Figure 3** Glutamine is a key metabolite for anaplerosis during *de novo* fatty acid synthesis and can be utilized via different pathways under different conditions. (A) Reactions in the TCA cycle. The citrate removed from the TCA cycle for use as a substrate for fatty acid synthesis is replenished by the  $\alpha$ -ketoglutarate generated from glutamine. (B) At high rates of *de novo* fatty acid synthesis (indicated by high ACC activity), our model predicts that the TCA cycle will shut down at low glutamine concentrations. Here, the flux through the enzyme  $\alpha$ -ketoglutarate dehydrogenase is shown as the TCA cycle flux. (C) High glutamine availability can drive a large fatty acid synthesis flux. (D) Glutamine can be utilized for fatty acid synthesis via distinct pathways under normoxic and hypoxic conditions. (E) Under hypoxic conditions, glutamine can be utilized via the reductive carboxylation pathway (see panel D). High activity of NADPH-dependent IDH is essential for reductive carboxylation. (F) Ratio of the concentration of different TCA cycle intermediates under normoxic conditions to the concentration under hypoxic conditions. Also shown is the difference in the mitochondrial  $NAD^+ : NADH$  ratio under the two conditions. Since the NADPH-dependent IDH pathway (active under hypoxic conditions) skips the TCA cycle reactions, activation of this pathway is accompanied by a decrease in the mitochondrial concentrations of multiple TCA cycle intermediates. Fluxes are in units of  $\text{mM h}^{-1}$  (millimolar per hour) and are shown at steady state.

Under glutamine deprivation, for example, due to a lack of glutamine availability in the microenvironment or due to treatment with a drug that inhibits glutamine uptake, a glutamine-independent anaplerotic pathway will be needed for *de novo* fatty acid synthesis. Pyruvate carboxylase (PC) can drive one such pathway which involves the conversion of pyruvate to oxaloacetate (Fig. 4 A). As shown in Fig. 4 B, under conditions of glutamine deprivation, cells with high PC activity can drive fatty acid synthesis by generating both the precursors of citrate— oxaloacetate and acetyl-CoA— from glucose-derived pyruvate. Our model predicts that cells with low PC activity cannot synthesize fatty acids *de novo* under glutamine deprivation and are thus more likely to be sensitive to glutamine deprivation therapies. Note that the PC-driven anaplerotic process short-circuits the TCA cycle (Fig. 4 A). Cells relying on this pathway will thus likely exhibit low TCA cycle flux and, consequently, a low oxygen consumption rate (Fig. 4 C) as compared to cells that rely on oxidative glutamine metabolism. Moreover, these cells will also exhibit low rates of lactate production as compared to glutamine-



dependent cells since double the number of pyruvate molecules is now needed for citrate synthesis (Fig. 4 D), decreasing the availability of pyruvate for lactate production.

To determine if PC activity is associated with low lactate production, we used a short hairpin RNA (shPC) to downregulate the expression of PC in MDA-MB-468 breast cancer cells (Fig. 4 E). Arrows in Fig. 4 C and Fig. 4 D indicate that downregulation of PC activity should be accompanied by a decline in the TCA cycle flux (and consequently, a decrease in the basal oxygen consumption rate (OCR)) and an increase in lactate production. This was confirmed by Seahorse analysis (Fig. 4 F) and NMR spectrometry (Fig. 4 G), respectively.

Interestingly, PC knockdown was also accompanied by an increase in cellular glutamine concentration (Fig. 4 H), indicating that increased glutamine uptake may compensate for decreased PC activity in MDA-MB-468 cells. Whether the increase in glutamine uptake upon PC knockdown is driven purely by metabolic feedback or by some gene regulatory mechanism remains to be determined.

Finally, we examined the model behavior under glucose deprivation and sufficient glutamine availability. As shown in Fig. 1 A and Fig. 5 C, cells are unlikely to be able to proliferate under such conditions (37). This is because key anabolic processes that use glycolytic intermediates as substrates, such as the ribose synthesis and the phospholipids synthesis pathways, will shut down when glucose is unavailable. However, cells can survive in such a scenario provided sufficient ATP is available to keep the basal cellular processes going. ATP can be generated in the absence of glucose by utilizing glutamine to drive the TCA cycle (Fig. 5 A). The enzyme ME2 (malic enzyme 2), which converts malate directly to pyruvate, can help drive a glutamine-dependent TCA cycle. Cells with high ME2 activity can thus survive glucose deprivation by using glutamine to generate ATP (Fig. 5 B). Note that ATP synthesis from glutamine in a glucose-independent manner is oxygen-dependent (Fig. 5 D)—the process involves an operational TCA cycle which generates NADH, and the conversion of glutamate to  $\alpha$ -ketoglutarate generates an additional NADH molecule. Oxygen must be available for the oxidation of NADH to  $\text{NAD}^+$  via the electron transport chain, a process that generates ATP. Under hypoxic conditions, NADH will accumulate and shut down not only the TCA cycle but also the entry of glutamine into the TCA cycle (Fig. 5 D). Cells in hypoxic niches are thus less likely to survive glucose deprivation as compared to cells in normoxic niches.

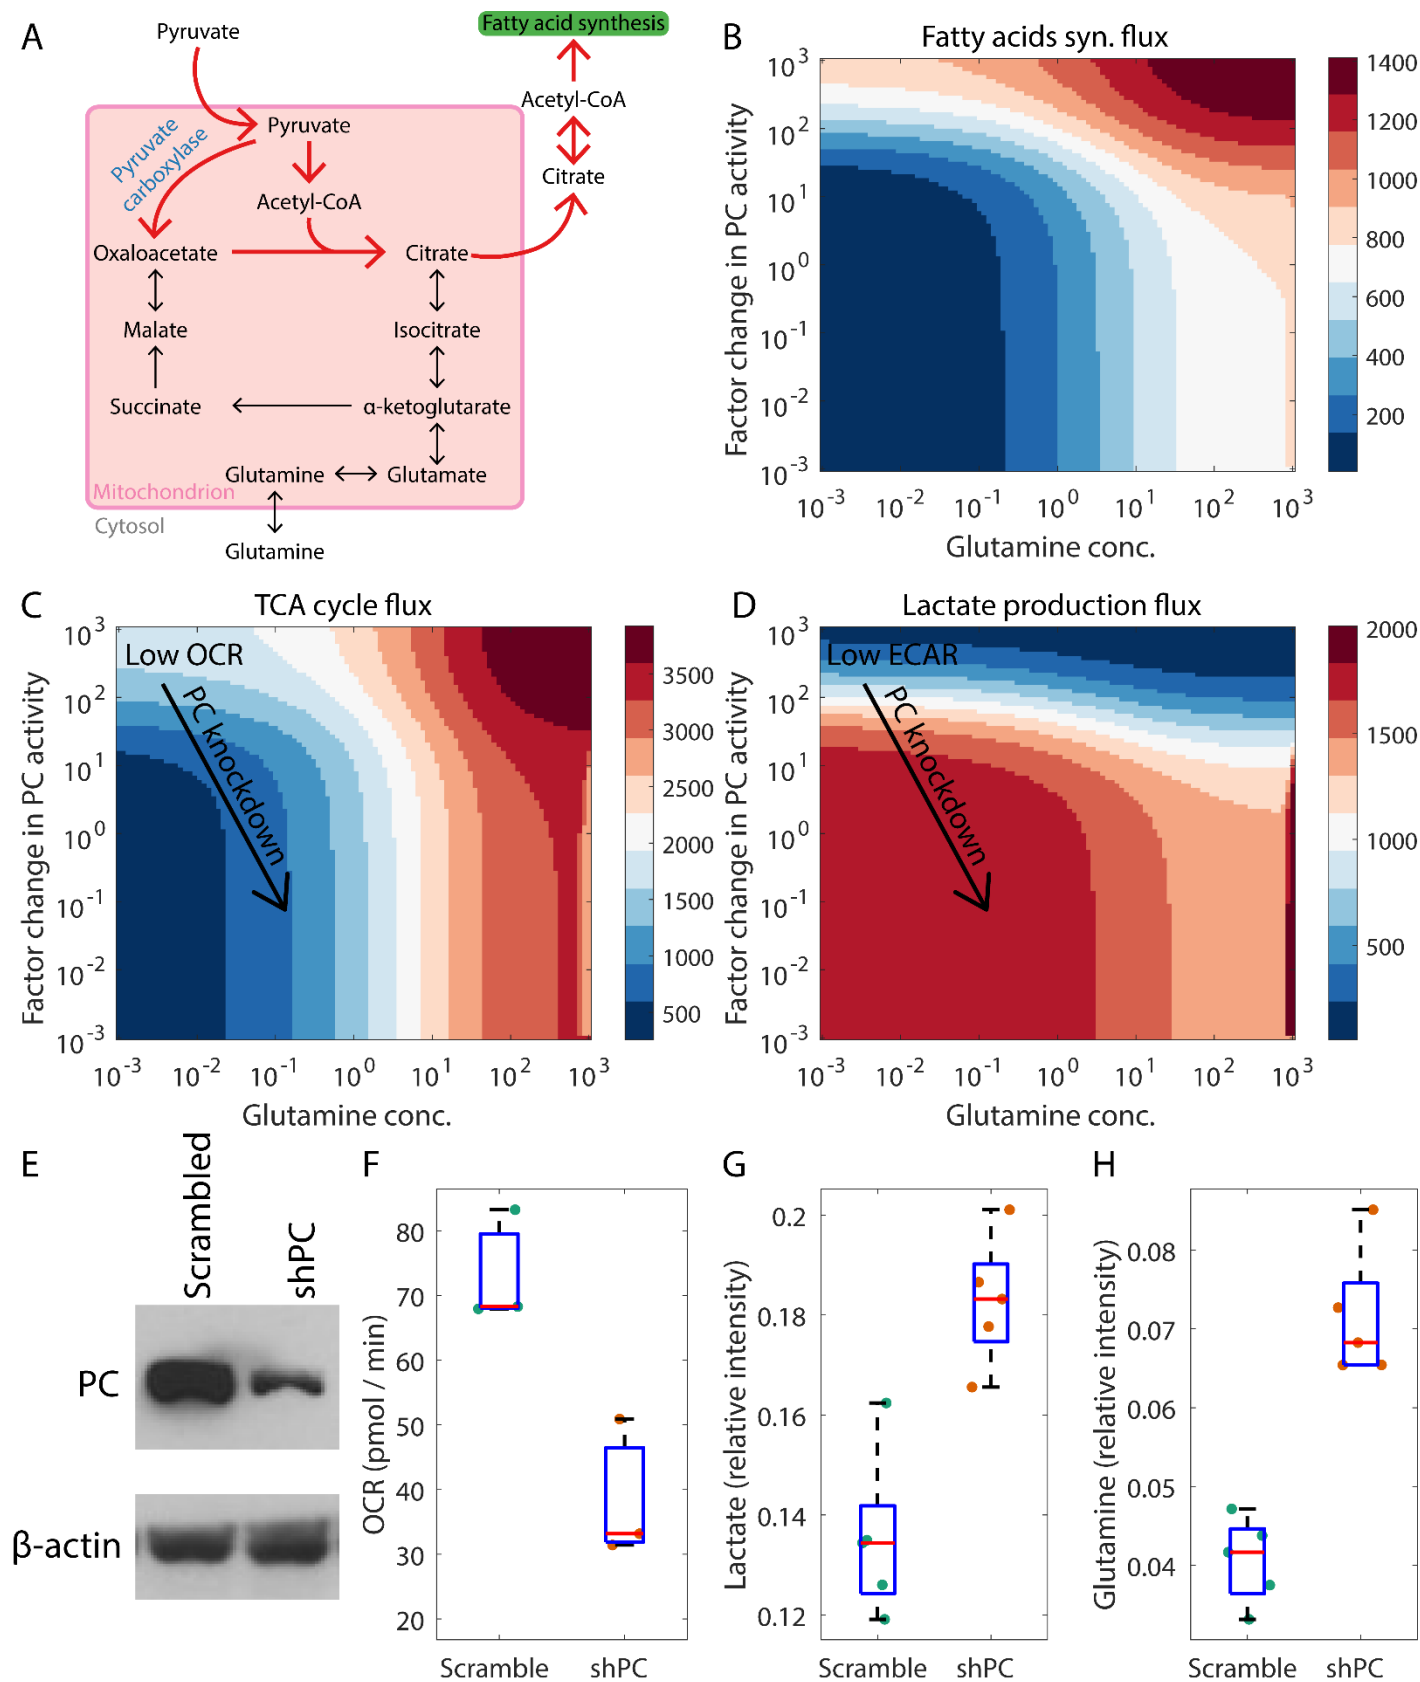

**Figure 4** Pyruvate carboxylase (PC)-dependent anaplerosis under low glutamine concentrations. (A) Reactions involved in PC-dependent anaplerosis during fatty acid synthesis. (B) At low glutamine concentrations, high PC activity can help maintain a significant fatty acid synthesis flux. (C) and (D) When

PC-dependent anaplerosis is the dominant anaplerotic pathway, cells carrying out *de novo* fatty acid synthesis will exhibit low TCA cycle flux and low oxidative phosphorylation (and consequently, low OCR) (C) and low lactate production (and consequently, low ECAR) (D). ECAR: extracellular acidification rate, which correlates positively with the rate of lactate excretion by cells. In panel C, the rate of conversion of TCA cycle-generated NADH to NAD<sup>+</sup> in an oxygen-dependent manner is shown as the TCA cycle flux. (E-G) Downregulating PC expression in MDA-MB-468 breast cancer cells decreases the oxygen consumption rate (OCR) and upregulates lactate production. (E) Western blot confirmed a decrease in the expression of the PC protein upon knockdown using PC shRNA compared to cells with control (Scrambled) shRNA. (F) Seahorse analysis shows decreased OCR in shPC cells (also, see arrow in panel C). NMR spectroscopy analysis shows increased lactate level (G) (also, see arrow in panel D) and increased glutamine level (H) in shPC cells. Fluxes are in units of mM h<sup>-1</sup> (millimolar per hour) and are shown at steady state (B-D).

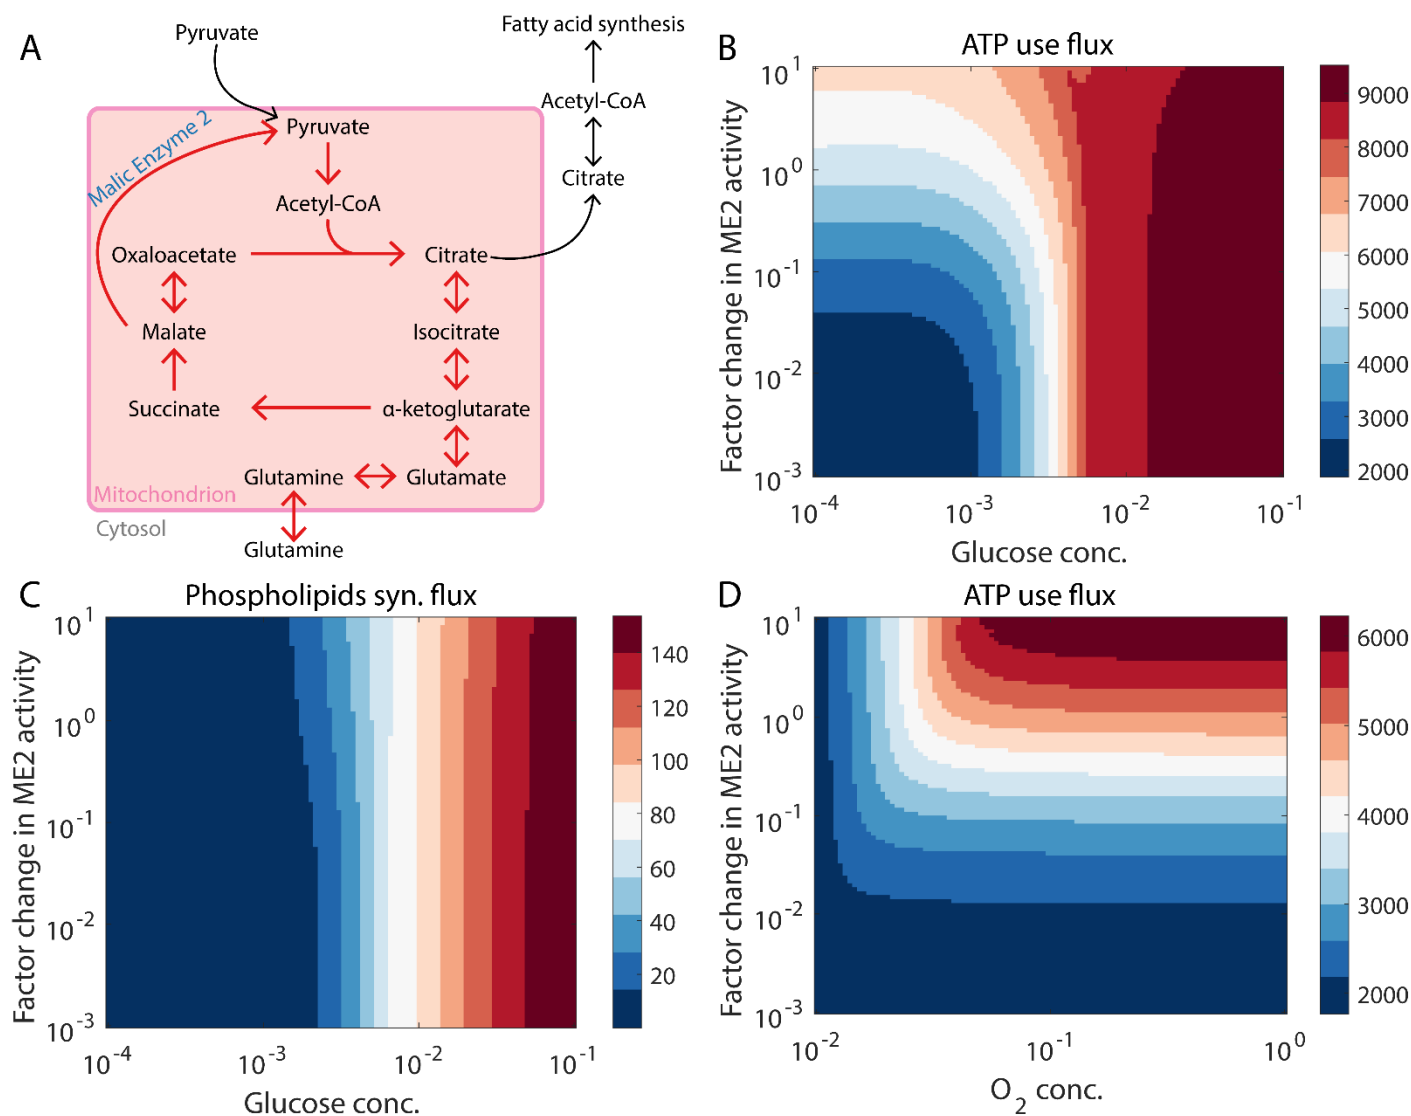

**Figure 5** Glutamine can drive the TCA cycle in the absence of glucose. (A) Reactions involved in the glutamine-driven TCA cycle when glucose concentration is low. (B) Under low glucose concentrations, malic enzyme 2 (ME2) activity must be upregulated to maintain a significant ATP production rate. (C) In the absence of glucose, the phospholipids synthesis flux remains low, irrespective of the ME2 activity. Thus, cells are unlikely to proliferate under low glucose concentrations (37). (D) Oxygen is essential for maintaining a

significant flux through pathways that consume ATP when glutamine is available, but the glucose concentration is low. Fluxes are in units of  $\text{mM h}^{-1}$  (millimolar per hour) and are shown at steady state.

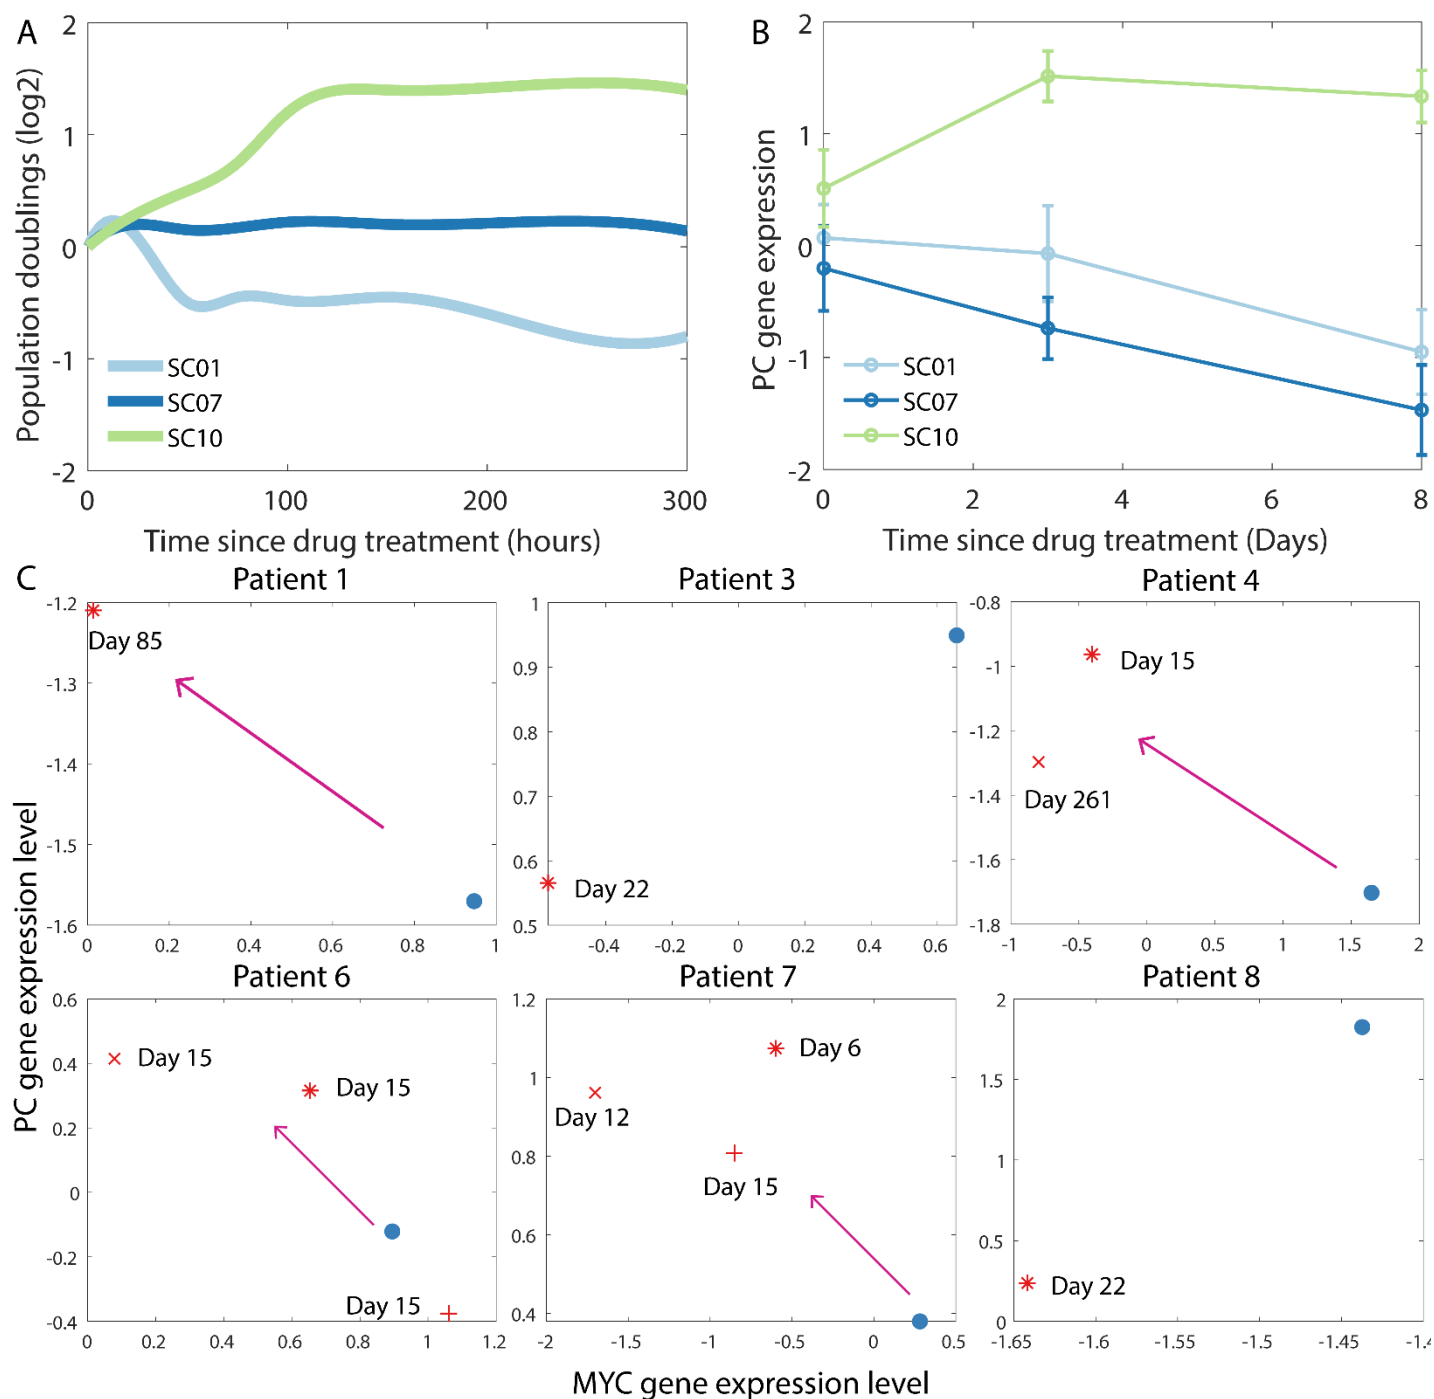

**Figure 6** Pyruvate carboxylase (PC) expression levels are altered in melanoma cells in response to BRAF signaling inhibitors. (A) Representative depiction of the response of three different subclones of the SKMEL5 melanoma cell line to treatment with PLX4720, a mutant BRAF inhibitor, as reported by Paudel *et al.* (38) (see Fig. 3 A therein). (B) RNA expression levels of the PC gene (Z-score calculated after log2 normalization) in the three subclones in (A) at 3 days and 8 days post-treatment with PLX4720. The gene expression data was obtained from Jia *et al.* (39). The error bars indicate the standard deviation. (C) RNA expression levels of MYC and PC genes (Z-score calculated after log2 normalization) in tumor samples obtained from melanoma



patients. In each panel, the blue dot indicates the expression levels before treatment. The different red markers in each panel indicate the expression levels in samples obtained at different time points after treatment with BRAF signaling inhibitors. The gene expression data was downloaded from the Gene Expression Omnibus database (accession GSE75299). See Song *et al.* (40) for details regarding the patient samples and the BRAF signaling inhibitor administered in each case.

### Interplay between metabolic plasticity and drug response in melanoma

Paudel *et al.* observed that single-cell-derived subclones of the SKMEL5 melanoma cell line, which carries a BRAF mutation, exhibit heterogeneity in their short-term response to the BRAF inhibitor PLX4720 (38) (Fig. 6 A; also see Fig. 2 A and Fig. 3 A in Paudel *et al.* (38)). Since BRAF signaling inhibition can suppress glutamine uptake by downregulating MYC (41,42), cells proliferating under PLX4720 treatment may resort to glutamine-independent anaplerotic pathways such as the PC-mediated pathway. We analyzed the gene expression profiles of the SKMEL5 subclones (reported by Jia *et al.* (39)) and observed that the expression of PC is upregulated in the SC10 subclone upon PLX4720 treatment (Fig. 6 B). Surprisingly, among the three subclones for which gene expression data is available, only SC10 showed population expansion in the short-term (< 150 hours) after PLX4720 treatment (Fig. 6 A). While subclone SC07 population is stationary, subclone SC01 exhibits population regression upon PLX4720 treatment. Both these subclones did not exhibit increased PC expression upon drug treatment (Fig. 6 B). Our modeling framework predicts that if SC10 cells are reliant on PC for anaplerosis under PLX4720 treatment as PC upregulation upon drug treatment would suggest, they must exhibit a low oxygen consumption rate (low OCR) and a low extracellular acidification rate due to low lactate production (low ECAR) (Fig. 4 C). Indeed, upon PLX4720 treatment, SC10 cells have been shown to switch to a metabolic state with low OCR and low ECAR (see Fig. 2 D in Jia *et al.* (39)). We further analyzed the gene expression profiles of melanoma tissue samples obtained from patients before and after treatment with a BRAF signaling inhibitor (40) (Gene Expression Omnibus (43) accession GSE75299). Out of the six patient samples, four exhibited upregulation of PC upon drug-induced BRAF signaling inhibition (Fig. 6 C). This is accompanied by the downregulation of MYC, a well-known target of BRAF signaling. Thus, our analysis suggests, albeit preliminarily, that PC-mediated anaplerosis may play a key role in the response of melanoma cells to treatment with BRAF signaling inhibitors, at least at short time scales.

## Discussion

The Warburg effect is perhaps the oldest recognized metabolic hallmark of cancer cells (3,6). However, multiple studies have now shown that the picture is far more complex—tumor cells within the primary tumor and those at different stages of metastatic progression exhibit widespread heterogeneity in their metabolic profiles (4,5). The metabolic phenotype can also co-vary with other functional attributes such as morphology (44), migratory phenotype (32,33), and stemness (45). Here, using a detailed mechanistic model of some of the key metabolic pathways in tumor cells, we show that variation in ATP usage can be a key driver of the metabolic heterogeneity exhibited by tumor cells. Differences in the availability of nutrients and in the ability of tumor cells to take up these nutrients can further contribute towards the diversity of metabolic profiles. By using a mechanistic modeling approach, our study avoids the difficulties associated with choosing an appropriate objective function and appropriate constraints that plague flux balance analyses. Further, our modeling approach captures the effect of feedback loops in metabolic pathways and we show that these are crucial to understanding the metabolic heterogeneity exhibited by tumor cells. Exploring the possible set of metabolic profiles that can be obtained by varying the reaction velocities in the model instead of fitting the model parameters to a set of experimental observations concerning a specific cell line allowed us to develop a broad framework to analyze diverse tumor metabolic profiles instead of making predictions pertaining only to a given experimental setup. While the framework in the present study does not include all the metabolic pathways active in tumor cells as is usually the case for genome-scale metabolic models (14), the predictions from our framework are far more interpretable and propose key principles that underly the metabolic profiles seen across tumor types. These principles could hold the key to identifying metabolic targets for anti-cancer therapy (5).

Our model predicts that in order to drive large fluxes through anabolic pathways that are crucial to fast proliferation, the cytosolic ATP concentration must be kept below a threshold to maintain the activity of PFK, a key enzyme in the glucose uptake pathway. This can explain why tumor cells, across cancer types, often prefer aerobic glycolysis over oxidative phosphorylation—the ATP yield per glucose molecule from aerobic glycolysis is less than one-tenth of the yield from oxidative phosphorylation (29). That the inhibition of PFK by high levels of ATP can drive aerobic glycolysis in tumor cells was first postulated by Scholnick *et al.* (46) nearly half a century ago. An important corollary that follows from this prediction is that the preference of tumor cells for aerobic glycolysis versus oxidative phosphorylation can be modulated by the rate of ATP consumption in these cells. We have built upon this corollary to describe how the metabolic state of tumor cells can depend on their migratory phenotype (32,33). The framework can also be helpful in understanding other behaviors exhibited by tumor and other fast proliferating cells. For example, the PI3K / Akt signaling pathway, which is activated in response to extracellular growth factors in normal, non-cancerous cells (47), transcriptionally upregulates ENTPD5. ENTPD5 promotes proper protein glycosylation and protein folding via a cycle of reactions that convert ATP to ADP (48). Our model predicts that the resulting increase in ATP consumption will increase the flux through anabolic pathways such as the phospholipids synthesis pathway, facilitating fast proliferation. Knockdown of ENTPD5 has indeed been shown to inhibit cell growth in PTEN-null mouse embryonic fibroblasts (48). The increased glycolytic flux from upregulated ATP consumption can also account for the observed upregulation of ATPases such as the Na<sup>+</sup> / K<sup>+</sup> pump in tumor cells (49–51). The idea that the operation of the Na<sup>+</sup> / K<sup>+</sup> pump can alter the rate of glycolysis was also proposed by Scholnick *et al.* (46). Note that the model of tumor metabolism described here does not incorporate ATP production from other metabolic pathways including from the  $\beta$ -oxidation of fatty acids. Inclusion of  $\beta$ -oxidation in the present model could shed light on the interplay between fatty acid metabolism and other cell behaviors including proliferation rates, and further unravel the context-dependence of fast proliferation rates on glycolytic flux.

Recently, Luengo *et al.* (52) have proposed that increased NAD<sup>+</sup> demand for oxidation as compared to the ATP demand during cell proliferation can drive a preference for aerobic glycolysis in multiple cell lines. In such a scenario, high ATP concentration and low ADP availability, resulting from low ATP usage, inhibits the regeneration of NAD<sup>+</sup> from the NADH produced during the TCA cycle. The limited NAD<sup>+</sup> availability limits cell proliferation. In the modeling framework described in the present study, high ATP concentration resulting from low ATP usage also drives a preference for aerobic glycolysis. However, in our framework, the NAD<sup>+</sup> concentration is not limiting. Rather, it is the anabolic fluxes, such as the flux through the phospholipids synthesis pathway, that become limiting due to the inhibition of PFK by ATP. The focus on increased anabolic fluxes required for cell division allows us to capture the increased glucose uptake and lactate production in tumor cells. Limited NAD<sup>+</sup> availability cannot account for the increased lactate production since uptake of carbon as glucose and its excretion as lactate is redox neutral overall. The two ideas, one described by Luengo *et al.* (52) and the other proposed in the present study, may be applicable in different scenarios depending on whether NAD<sup>+</sup> is limiting or not.

Tumor cells, across cancer types, can rely on different growth signaling pathways to drive continued cell proliferation (53,54). Different growth signaling pathways often activate distinct pathways to drive the same cellular process. For example, in prostate cancer cells, androgen-receptor mediated signaling promotes the uptake of fatty acids from the extracellular environment while PI3K / Akt signaling drives *de novo* fatty acid synthesis (35). In the case of breast cancer, receptor-positive breast cancer cells rely primarily on *de novo* fatty acid synthesis while basal-like, receptor-negative breast cancer cells take up fatty acids from the extracellular environment (55). The present modeling framework can provide useful insights into the metabolic profiles of cancer cells reliant on different growth signaling pathways. Our model predicts that tumor cells that synthesize fatty acids *de novo* must increase their glutamine uptake or upregulate the expression of the enzyme PC. While cells taking up glutamine will maintain high lactate production, lactate production will be down-regulated in cells upregulating PC activity. In contrast, tumor cells that can take up fatty acids can rely on these both for ATP generation (via  $\beta$ -oxidation) and for anabolic processes. These cells will thus likely have both low glutamine uptake and low glucose uptake. Prostate cancer cells treated with an inhibitor of androgen receptor signaling

such as enzalutamide can develop resistance by activating the PI3K / Akt signaling pathway, thereby turning on *de novo* fatty acid synthesis (56). Our modeling framework predicts that the emergence of enzalutamide resistance must be accompanied by a change in the metabolic profile of tumor cells including an increase in glucose uptake. A recent study has shown that the activities of signaling pathways that regulate cell metabolism, including the p38 pathway, are indeed altered by enzalutamide treatment in prostate cancer cells (57).

Multiple studies have shown a tight coupling between cell-type switching and change in the metabolic state of cells, especially in the context of epithelial-mesenchymal plasticity. Bhattacharya *et al.* showed that neural crest cells in a chicken embryo activate aerobic glycolysis at the onset of cell migration and that an increase in glycolytic flux is essential for driving an epithelial to mesenchymal transition (58). Luo *et al.* have shown that inhibition of glucose uptake via treatment with 2-deoxyglucose leads to an increase in reactive oxygen species (ROS) concentration, causing mesenchymal breast cancer stem cells to switch to a more epithelial state (but not to a fully epithelial state) (44). Our modeling framework suggests that inhibition of glucose uptake will lead to increased reliance on glutamine for ATP production (Fig. 5 A and Fig. 5 B). Apart from playing a key role in anaplerosis and in glucose-independent ATP production, glutamine also drives an anti-oxidant response via the glutathione pathway (59). Treatment with 2-deoxyglucose could thus decrease the availability of glutamine for the anti-oxidant response. The consequent increase in ROS concentration can upregulate NRF2 which has been shown to stabilize a hybrid epithelial-mesenchymal state (60). Further, given the low availability of glutamine for the anti-oxidant pathway, epithelial cells would be more susceptible to thioredoxin suppression (44) (thioredoxin mediates a glutamine-independent anti-oxidant response). Incorporating ROS generation and anti-oxidant pathways into the present modeling framework could thus help further our understanding of metabolic dependence in cell-type switching.

Finally, our modeling framework could be useful for analyzing the interplay between metabolic re-programming and epigenetic re-programming in cancer cells (61), a topic that has recently come into focus (62,63). The modeling framework described here can be used to predict how the relative concentrations of certain metabolites will change in response to a metabolic switch (see Fig. 3 F). For example, when cells turn on *de novo* fatty acid synthesis, the cytoplasmic concentration of acetyl-CoA must increase. This will increase the availability of acetyl-CoA for the acetylation of cellular proteins, including histones. Such an increase in the acetylation of cellular proteins in prostate cancer cells upon androgen receptor inhibition (which is accompanied by an increase in *de novo* fatty acid synthesis) has been shown experimentally (64), and has been proposed to promote the stabilization of the androgen receptor (56). Further, PI3K / Akt inhibition, which will downregulate *de novo* fatty acid synthesis, has been shown to deplete the H3K27ac epigenetic modification, thereby remodeling the chromatin landscape. This epigenetic remodeling can hinder the emergence of resistance to androgen receptor inhibition (65). Previous studies have proposed that epigenetic changes in response to metabolic stress induced by environmental changes can increase transcriptional variability in cells. The increased transcriptional variation can help mitigate the metabolic stress and promote adaptation to new environmental conditions (66,67). Mechanistic coupling between metabolism, epigenetics, and transcriptional regulation could play a role in the emergence of drug resistance in cancer cells (68–70). Building upon the present modeling framework to further explore how the metabolic state can alter the epigenetic state in tumor cells is a promising future endeavor, and could shed light on the mechanistic underpinnings of failure of anti-cancer therapies.

## References

1. Hanahan D, Weinberg RA. Hallmarks of Cancer: The Next Generation. *Cell*. 2011;144:646–74.
2. Martinez-Outschoorn UE, Peiris-Pagés M, Pestell RG, Sotgia F, Lisanti MP. Cancer metabolism: a therapeutic perspective. *Nat Rev Clin Oncol*. 2017;14:11–31.
3. Warburg O, Posener K, Negelein E. Über den Stoffwechsel der Tumoren. *Biochem Z*. 1924;152:319–44.

4. Lehuédé C, Dupuy F, Rabinovitch R, Jones RG, Siegel PM. Metabolic Plasticity as a Determinant of Tumor Growth and Metastasis. *Cancer Res.* 2016;76:5201–8.
5. Faubert B, Solmonson A, DeBerardinis RJ. Metabolic reprogramming and cancer progression. *Science.* 2020;368:eaaw5473.
6. DeBerardinis RJ, Chandel NS. We need to talk about the Warburg effect. *Nat Metab.* 2020;2:127–9.
7. Warburg O. On the Origin of Cancer Cells. *Science.* 1956;123:309–14.
8. Funes JM, Quintero M, Henderson S, Martinez D, Qureshi U, Westwood C, et al. Transformation of human mesenchymal stem cells increases their dependency on oxidative phosphorylation for energy production. *Proc Natl Acad Sci USA.* 2007;104:6223–8.
9. Mori S, Chang JT, Andrechek ER, Matsumura N, Baba T, Yao G, et al. Anchorage-independent cell growth signature identifies tumors with metastatic potential. *Oncogene.* 2009;28:2796–805.
10. Weinhouse S. On Respiratory Impairment in Cancer Cells. *Science.* 1956;124:267–9.
11. Heinrich R, Schuster S, Holzhütter H-G. Mathematical analysis of enzymic reaction systems using optimization principles. In: Christen P, Hofmann E, editors. *EJB Reviews 1991.* Berlin, Heidelberg: Springer; 1991. page 167–87.
12. Pfeiffer T, Schuster S. Game-theoretical approaches to studying the evolution of biochemical systems. *Trends Biochem Sci.* 2005;30:20–5.
13. Vazquez A, Liu J, Zhou Y, Oltvai ZN. Catabolic efficiency of aerobic glycolysis: The Warburg effect revisited. *BMC Syst Biol.* 2010;4:58.
14. Shlomi T, Benyamini T, Gottlieb E, Sharan R, Ruppin E. Genome-Scale Metabolic Modeling Elucidates the Role of Proliferative Adaptation in Causing the Warburg Effect. *PLoS Comput Biol.* 2011;7:e1002018.
15. Jia D, Lu M, Jung KH, Park JH, Yu L, Onuchic JN, et al. Elucidating cancer metabolic plasticity by coupling gene regulation with metabolic pathways. *Proc Natl Acad Sci USA.* 2019;116:3909–18.
16. Raman K, Chandra N. Flux balance analysis of biological systems: applications and challenges. *Brief Bioinform.* 2009;10:435–49.
17. Mulukutla BC, Yongky A, Daoutidis P, Hu W-S. Bistability in Glycolysis Pathway as a Physiological Switch in Energy Metabolism. *PLOS ONE.* 2014;9:e98756.
18. Wu F, Yang F, Vinnakota KC, Beard DA. Computer Modeling of Mitochondrial Tricarboxylic Acid Cycle, Oxidative Phosphorylation, Metabolite Transport, and Electrophysiology. *J Biol Chem.* 2007;282:24525–37.
19. Engel PC, Dalziel K. Kinetic studies of glutamate dehydrogenase. The reductive amination of 2-oxoglutarate. *Biochem J.* 1970;118:409–19.
20. Barden RE, Fung CH, Utter MF, Scrutton MC. Pyruvate carboxylase from chicken liver. Steady state kinetic studies indicate a “two-site” ping-pong mechanism. *J Biol Chem.* 1972;247:1323–33.
21. Mallick S, Harris BG, Cook PF. Kinetic mechanism of NAD:malic enzyme from *Ascaris suum* in the direction of reductive carboxylation. *J Biol Chem.* 1991;266:2732–8.



22. Nazaret C, Heiske M, Thurley K, Mazat J-P. Mitochondrial energetic metabolism: A simplified model of TCA cycle with ATP production. *J Theor Biol.* 2009;258:455–64.
23. Berg JM, Tymoczko JL, Stryer L. *Enzymes: Basic Concepts and Kinetics.* Biochemistry. 5th ed. New York: W. H. Freeman and Company; 2002. page 189–226.
24. Roy M, Finley SD. Computational Model Predicts the Effects of Targeting Cellular Metabolism in Pancreatic Cancer. *Front Physiol.* 2017;8.
25. Park JH, Vithayathil S, Kumar S, Sung P-L, Dobrolecki LE, Putluri V, et al. Fatty Acid Oxidation-Driven Src Links Mitochondrial Energy Reprogramming and Oncogenic Properties in Triple-Negative Breast Cancer. *Cell Rep.* 2016;14:2154–65.
26. Pudakalakatti SM, Uppangala S, D’Souza F, Kalthur G, Kumar P, Adiga SK, et al. NMR studies of preimplantation embryo metabolism in human assisted reproductive techniques: a new biomarker for assessment of embryo implantation potential. *NMR Biomed.* 2013;26:20–7.
27. Wishart DS, Tzur D, Knox C, Eisner R, Guo AC, Young N, et al. HMDB: the Human Metabolome Database. *Nucleic Acids Res.* 2007;35:D521-526.
28. Lunt SY, Vander Heiden MG. Aerobic Glycolysis: Meeting the Metabolic Requirements of Cell Proliferation. *Annu Rev Cell Dev Bio.* 2011;27:441–64.
29. Nelson DL, Cox MM. *The Citric Acid Cycle.* Lehninger Principles of Biochemistry. 4th ed. New York: W. H. Freeman and Company; 2005. page 601–30.
30. Nelson DL, Cox MM. *Glycolysis, Gluconeogenesis, and the Pentose Phosphate Pathway.* Lehninger Principles of Biochemistry. 4th ed. New York: W. H. Freeman and Company; 2005. page 521–59.
31. Li Y, Yao L, Mori Y, Sun SX. On the energy efficiency of cell migration in diverse physical environments. *Proc Natl Acad Sci USA.* 2019;116:23894–900.
32. Boekhorst V te, Jiang L, Mählen M, Meerlo M, Dunkel G, Durst FC, et al. Calpain-2 regulates hypoxia/HIF-induced amoeboid reprogramming and metastasis. *bioRxiv.* 2020;2020.01.06.892497.
33. Commander R, Wei C, Sharma A, Mouw JK, Burton LJ, Summerbell E, et al. Subpopulation targeting of pyruvate dehydrogenase and GLUT1 decouples metabolic heterogeneity during collective cancer cell invasion. *Nat Commun.* 2020;11:1533.
34. Baksh SC, Todorova PK, Gur-Cohen S, Hurwitz B, Ge Y, Novak JSS, et al. Extracellular serine controls epidermal stem cell fate and tumour initiation. *Nat Cell Biol.* 2020;22:779–90.
35. Koundouros N, Poulgiannis G. Reprogramming of fatty acid metabolism in cancer. *Br J Cancer.* 2020;122:4–22.
36. Brunengraber H, Roe CR. Anaplerotic molecules: current and future. *J Inherit Metab Dis.* 2006;29:327–31.
37. Singh B, Shamsnia A, Raythatha MR, Milligan RD, Cady AM, Madan S, et al. Highly Adaptable Triple-Negative Breast Cancer Cells as a Functional Model for Testing Anticancer Agents. *PLOS ONE.* 2014;9:e109487.

38. Paudel BB, Harris LA, Hardeman KN, Abugable AA, Hayford CE, Tyson DR, et al. A Nonquiescent “Idling” Population State in Drug-Treated, BRAF-Mutated Melanoma. *Biophys J*. 2018;114:1499–511.
39. Jia D, Paudel BB, Hayford CE, Hardeman KN, Levine H, Onuchic JN, et al. Drug-Tolerant Idling Melanoma Cells Exhibit Theory-Predicted Metabolic Low-Low Phenotype. *Front Oncol*. 2020;10:1426.
40. Song C, Piva M, Sun L, Hong A, Moriceau G, Kong X, et al. Recurrent Tumor Cell-Intrinsic and -Extrinsic Alterations during MAPKi-Induced Melanoma Regression and Early Adaptation. *Cancer Discov*. 2017;7:1248–65.
41. Stefan E, Bister K. MYC and RAF: Key Effectors in Cellular Signaling and Major Drivers in Human Cancer. *Curr Top Microbiol Immunol*. 2017;407:117–51.
42. Nicklin P, Bergman P, Zhang B, Triantafellow E, Wang H, Nyfeler B, et al. Bidirectional Transport of Amino Acids Regulates mTOR and Autophagy. *Cell*. 2009;136:521–34.
43. Barrett T, Wilhite SE, Ledoux P, Evangelista C, Kim IF, Tomashevsky M, et al. NCBI GEO: archive for functional genomics data sets—update. *Nucleic Acids Res*. 2013;41:D991–5.
44. Luo M, Shang L, Brooks MD, Jiagge E, Zhu Y, Buschhaus JM, et al. Targeting Breast Cancer Stem Cell State Equilibrium through Modulation of Redox Signaling. *Cell Metab*. 2018;28:69–86.e6.
45. Moussaieff A, Rouleau M, Kitsberg D, Cohen M, Levy G, Barasch D, et al. Glycolysis-Mediated Changes in Acetyl-CoA and Histone Acetylation Control the Early Differentiation of Embryonic Stem Cells. *Cell Metab*. 2015;21:392–402.
46. Scholnick P, Lang D, Racker E. Regulatory mechanisms in carbohydrate metabolism. IX. Stimulation of aerobic glycolysis by energy-linked ion transport and inhibition by dextran sulfate. *J Biol Chem*. 1973;248:5175–82.
47. Ward PS, Thompson CB. Signaling in Control of Cell Growth and Metabolism. *Cold Spring Harb Perspect Biol*. 2012;4:a006783.
48. Fang M, Shen Z, Huang S, Zhao L, Chen S, Mak TW, et al. The ER UDPase ENTPD5 promotes protein N-glycosylation, the Warburg effect, and proliferation in the PTEN pathway. *Cell*. 2010;143:711–24.
49. Sakai H, Suzuki T, Maeda M, Takahashi Y, Horikawa N, Minamimura T, et al. Up-regulation of Na<sup>+</sup>,K<sup>+</sup>-ATPase  $\alpha$ 3-isoform and down-regulation of the  $\alpha$ 1-isoform in human colorectal cancer. *FEBS Lett*. 2004;563:151–4.
50. Kometiani P, Liu L, Askari A. Digitalis-Induced Signaling by Na<sup>+</sup>/K<sup>+</sup>-ATPase in Human Breast Cancer Cells. *Mol Pharmacol*. 2005;67:929–36.
51. Khajah MA, Mathew PM, Luqmani YA. Na<sup>+</sup>/K<sup>+</sup> ATPase activity promotes invasion of endocrine resistant breast cancer cells. *PLOS ONE*. 2018;13:e0193779.
52. Luengo A, Li Z, Gui DY, Sullivan LB, Zagorulya M, Do BT, et al. Increased demand for NAD<sup>+</sup> relative to ATP drives aerobic glycolysis. *bioRxiv*. 2020;2020.06.08.140558.
53. Sanchez-Vega F, Mina M, Armenia J, Chatila WK, Luna A, La KC, et al. Oncogenic Signaling Pathways in The Cancer Genome Atlas. *Cell*. 2018;173:321–337.e10.

54. Sever R, Brugge JS. Signal Transduction in Cancer. *Cold Spring Harb Perspect Med.* 2015;5.
55. Monaco ME. Fatty acid metabolism in breast cancer subtypes. *Oncotarget.* 2017;8:29487–500.
56. Shah S, Carriveau WJ, Li J, Campbell SL, Kopinski PK, Lim H-W, et al. Targeting ACLY sensitizes castration-resistant prostate cancer cells to AR antagonism by impinging on an ACLY-AMPK-AR feedback mechanism. *Oncotarget.* 2016;7:43713–30.
57. Ware KE, Gupta S, Eng J, Kemeny G, Puvindran BJ, Foo W-C, et al. Convergent evolution of p38/MAPK activation in hormone resistant prostate cancer mediates pro-survival, immune evasive, and metastatic phenotypes. *bioRxiv.* 2020;2020.04.22.050385.
58. Bhattacharya D, Azambuja AP, Simoes-Costa M. Metabolic Reprogramming Promotes Neural Crest Migration via Yap/Tea Signaling. *Dev Cell.* 2020;53:199–211.e6.
59. Mari M, Morales A, Colell A, García-Ruiz C, Fernández-Checa JC. Mitochondrial Glutathione, a Key Survival Antioxidant. *Antioxid Redox Sign.* 2009;11:2685–700.
60. Bocci F, Tripathi SC, Vilchez Mercedes SA, George JT, Casabar JP, Wong PK, et al. NRF2 activates a partial epithelial-mesenchymal transition and is maximally present in a hybrid epithelial/mesenchymal phenotype. *Int Bio (Cam).* 2019;11:251–63.
61. Reid MA, Dai Z, Locasale JW. The impact of cellular metabolism on chromatin dynamics and epigenetics. *Nat Cell Biol.* 2017;19:1298–306.
62. Carrer A, Trefely S, Zhao S, Campbell SL, Norgard RJ, Schultz KC, et al. Acetyl-CoA Metabolism Supports Multistep Pancreatic Tumorigenesis. *Cancer Discov.* 2019;9:416–35.
63. Morris JP, Yashinskii JJ, Koche R, Chandwani R, Tian S, Chen C-C, et al.  $\alpha$ -Ketoglutarate links p53 to cell fate during tumour suppression. *Nature.* 2019;573:595–9.
64. Xu S, Fan L, Jeon H-Y, Zhang F, Cui X, Mickle MB, et al. p300-Mediated Acetylation of Histone Demethylase JMJD1A Prevents Its Degradation by Ubiquitin Ligase STUB1 and Enhances Its Activity in Prostate Cancer. *Cancer Res.* 2020;80:3074–87.
65. Adelaiye-Ogala R, Gryder BE, Nguyen YTM, Alilin AN, Grayson AR, Bajwa W, et al. Targeting the PI3K/AKT Pathway Overcomes Enzalutamide Resistance by Inhibiting Induction of the Glucocorticoid Receptor. *Mol Cancer Ther.* 2020;19:1436–47.
66. Freddolino PL, Yang J, Momen-Roknabadi A, Tavazoie S. Stochastic tuning of gene expression enables cellular adaptation in the absence of pre-existing regulatory circuitry. *eLife.* 2018;7:e31867.
67. Woronoff G, Nghe P, Baudry J, Boitard L, Braun E, Griffiths AD, et al. Metabolic cost of rapid adaptation of single yeast cells. *Proc Natl Acad Sci USA.* 2020;117:10660–6.
68. Domingues AF, Kulkarni R, Giotopoulos G, Gupta S, Vinnenberg L, Arede L, et al. Loss of Kat2a enhances transcriptional noise and depletes acute myeloid leukemia stem-like cells. *eLife.* 2020;9:e51754.
69. Hinohara K, Wu H-J, Vigneau S, McDonald TO, Igarashi KJ, Yamamoto KN, et al. KDM5 Histone Demethylase Activity Links Cellular Transcriptomic Heterogeneity to Therapeutic Resistance. *Cancer Cell.* 2018;34:939–953.e9.

70. Pastore A, Gaiti F, Lu SX, Brand RM, Kulm S, Chaligne R, et al. Corrupted coordination of epigenetic modifications leads to diverging chromatin states and transcriptional heterogeneity in CLL. *Nat Commun.* 2019;10:1874.
